# Supplementary material
Source: MDPI journal article supplement (https://www.mdpi.com/2073-4395/9/7/381)
Supplement: s1 [file s1]

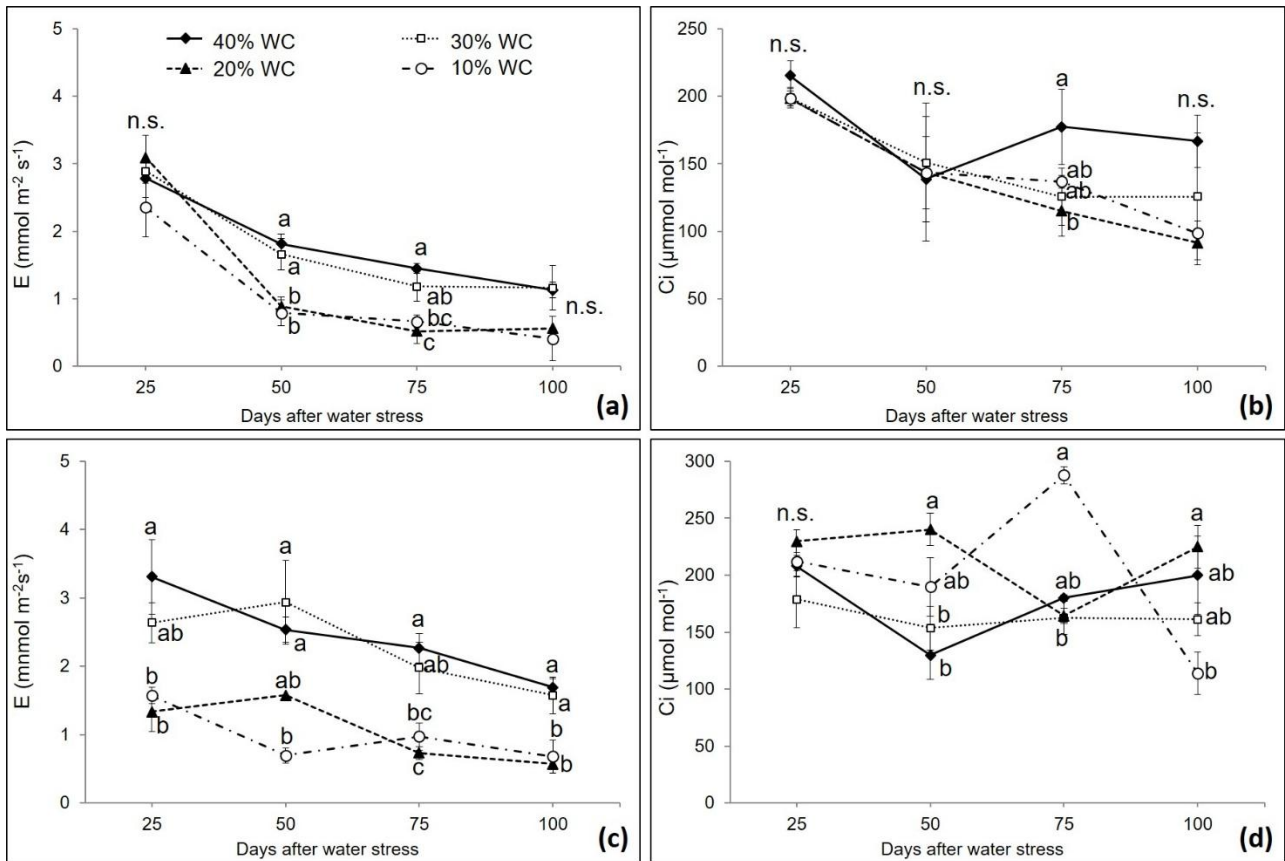

**Figure S1.** Transpiration rate (E) and Sub-stomatal CO<sub>2</sub> (C<sub>i</sub>) in Polygala (a-b) and Viburnum (c-d) during the experiment. Plants were irrigated to container capacity (40% WC) or subjected to water stress treatments (30% WC, 20% WC and 10% WC). Mean values ±S.E. (n=6). An absence of bars denotes a size smaller than the symbol. Different letters indicate significant differences between treatments at each sampling time as determined by Tukey's test (P < 0.05).
